# Supplementary material for: Comparative Genomics of Taphrina Fungi Causing Varying Degrees of Tumorous Deformity in Plants
Source: PubMed Central journal article supplement (PMC4007546; doi:10.1093/gbe/evu067), 2014-03-28
Supplement: supp_evu067_Taphrina.SupTables.revisedv2.pdf [file supp_evu067_Taphrina.SupTables.revisedv2.pdf]

**Table S1** – *Taphrina* species used in this study

| Species              | JCM no. | Source of isolation                                                                                    | Host range                                 | Distribution                                                       | Disease symptom           |
|----------------------|---------|--------------------------------------------------------------------------------------------------------|--------------------------------------------|--------------------------------------------------------------------|---------------------------|
| <i>T. wiesneri</i>   | 22204   | Sakura cherry (isolated by K. Tubaki)                                                                  | <i>Prunus</i> (Subgenus <i>Cerasus</i> )   | Europe, North America, Australia, New Zealand, South Africa, Japan | Witches' brooms           |
| <i>T. deformans</i>  | 22205   | Leaf of <i>Prunus persica</i> in Minami-Senri, Osaka, Japan<br>(isolated by T. Yokoyama in 1968 March) | <i>Prunus</i> (Subgenus <i>Amygdalus</i> ) | Worldwide                                                          | Leaf curl                 |
| <i>T. populina</i>   | 22190   | <i>Populus nigra</i> (isolated by A.J. Mix)                                                            | <i>Populus</i>                             | Europe, North America, India, China, Japan                         | Yellow leaf spots         |
| <i>T. flavorubra</i> | 22207*  | Unknown (isolated by C.L. Kramer)                                                                      | <i>Prunus</i> (Subgenus <i>Prunus</i> )    | North America                                                      | Deformed fruits (pockets) |

\* The strain was identified by C.L. Kramer as *T. flavorubra*, although it has 2 nucleotide substitutions in D1/D2 region of LSU rDNA compared to *T. flavorubra* NRRL Y-17795<sup>T</sup> (AF492040).

**Table S2** – *Taphrina* genome repeat content

| Species              | Category      | copy number | total length of repeats in genome | number of copies   | % assembly  |
|----------------------|---------------|-------------|-----------------------------------|--------------------|-------------|
| <i>T. wiesneri</i>   | DNA           | 17          | 24,376                            | 81 (54)            | 0.2%        |
|                      | LINE          | 1           | 552                               | 1 (1)              | 0.0%        |
|                      | LTR           | 14          | 21,303                            | 30 (20)            | 0.2%        |
|                      | no TE feature | 1           | 9,089                             | 34 (30)            | 0.1%        |
|                      | <b>Total</b>  | <b>33</b>   | <b>55,320</b>                     | <b>146 (105)</b>   | <b>0.4%</b> |
| <i>T. deformans</i>  | DNA           | 33          | 82,688                            | 209 (97)           | 0.6%        |
|                      | LINE          | 4           | 4,324                             | 5 (4)              | 0.0%        |
|                      | LTR           | 42          | 186,615                           | 245 (107)          | 1.4%        |
|                      | no TE feature | 9           | 352,907                           | 863 (168)          | 2.6%        |
|                      | <b>Total</b>  | <b>88</b>   | <b>626,534</b>                    | <b>1,322 (376)</b> | <b>4.5%</b> |
| <i>T. populina</i>   | DNA           | 19          | 55,608                            | 211 (51)           | 0.5%        |
|                      | LINE          | 10          | 14,726                            | 36 (26)            | 0.1%        |
|                      | LTR           | 60          | 112,280                           | 402 (87)           | 0.9%        |
|                      | no TE feature | 8           | 79,800                            | 320 (139)          | 0.7%        |
|                      | <b>Total</b>  | <b>97</b>   | <b>262,414</b>                    | <b>969 (303)</b>   | <b>2.2%</b> |
| <i>T. flavorubra</i> | DNA           | 52          | 122,064                           | 336 (142)          | 0.8%        |
|                      | LINE          | 11          | 51,413                            | 85 (37)            | 0.3%        |
|                      | LTR           | 88          | 466,814                           | 760 (299)          | 3.0%        |
|                      | no TE feature | 22          | 538,156                           | 1,540 (460)        | 3.4%        |
|                      | <b>Total</b>  | <b>173</b>  | <b>1,178,447</b>                  | <b>2,721 (938)</b> | <b>7.5%</b> |

**Table S3** - List of significantly enriched GO terms on the disomy scaffold of *T. deformans* (p< 0.05)

| <b>GO terms</b> | <b>GO term definition</b>                                                               | <b>Annotated</b> | <b>Significant</b> | <b>Expected</b> | <b>p values</b> |
|-----------------|-----------------------------------------------------------------------------------------|------------------|--------------------|-----------------|-----------------|
| GO:0006082      | organic acid metabolic process                                                          | 370              | 18                 | 12.97           | 0.0012          |
| GO:0045899      | positive regulation of RNA polymerase II transcriptional preinitiation complex assembly | 3                | 2                  | 0.11            | 0.0036          |
| GO:0051004      | regulation of lipoprotein lipase activity                                               | 3                | 2                  | 0.11            | 0.0036          |
| GO:0043666      | regulation of phosphoprotein phosphatase activity                                       | 4                | 2                  | 0.14            | 0.007           |
| GO:0008054      | cyclin catabolic process                                                                | 4                | 2                  | 0.14            | 0.007           |
| GO:0048366      | leaf development                                                                        | 5                | 2                  | 0.18            | 0.0114          |
| GO:0045842      | positive regulation of mitotic metaphase/anaphase transition                            | 6                | 2                  | 0.21            | 0.0167          |
| GO:0006303      | double-strand break repair via nonhomologous end joining                                | 6                | 2                  | 0.21            | 0.0167          |
| GO:0034765      | regulation of ion transmembrane transport                                               | 6                | 2                  | 0.21            | 0.0167          |
| GO:0006783      | heme biosynthetic process                                                               | 12               | 3                  | 0.42            | 0.0227          |
| GO:0044282      | small molecule catabolic process                                                        | 51               | 3                  | 1.79            | 0.0299          |
| GO:0007091      | mitotic metaphase/anaphase transition                                                   | 37               | 5                  | 1.3             | 0.0345          |
| GO:0045937      | positive regulation of phosphate metabolic process                                      | 18               | 3                  | 0.63            | 0.0348          |
| GO:0043331      | response to dsRNA                                                                       | 10               | 2                  | 0.35            | 0.0349          |
| GO:0030162      | regulation of proteolysis                                                               | 12               | 2                  | 0.42            | 0.0349          |
| GO:0045839      | negative regulation of mitosis                                                          | 20               | 2                  | 0.7             | 0.035           |
| GO:0034641      | cellular nitrogen compound metabolic process                                            | 1806             | 63                 | 63.32           | 0.0355          |
| GO:0007067      | mitosis                                                                                 | 112              | 9                  | 3.93            | 0.0409          |
| GO:0016567      | protein ubiquitination                                                                  | 91               | 9                  | 3.19            | 0.0456          |

**Table S4.** GO terms enriched in novel or diverged families identified in each *Taphrina* species

| Species              | GO terms   | GO term definition                                            | Annotated | Significant | Expected | p values |
|----------------------|------------|---------------------------------------------------------------|-----------|-------------|----------|----------|
| <i>T. wiesneri</i>   | GO:0006357 | regulation of transcription from RNA polymerase II promoter   | 544       | 59          | 34.28    | 0.00051  |
| <i>T. wiesneri</i>   | GO:0009688 | abscisic acid biosynthetic process                            | 5         | 3           | 0.32     | 0.00226  |
| <i>T. wiesneri</i>   | GO:0009749 | response to glucose stimulus                                  | 6         | 3           | 0.38     | 0.00431  |
| <i>T. wiesneri</i>   | GO:0000272 | polysaccharide catabolic process                              | 86        | 9           | 5.42     | 0.00701  |
| <i>T. deformans</i>  | GO:0006357 | regulation of transcription from RNA polymerase II promoter   | 225       | 69          | 36.59    | 1.10E-08 |
| <i>T. deformans</i>  | GO:0006355 | regulation of transcription, DNA-dependent                    | 547       | 152         | 88.96    | 1.40E-08 |
| <i>T. deformans</i>  | GO:0001539 | ciliary or flagellar motility                                 | 4         | 4           | 0.65     | 0.0007   |
| <i>T. deformans</i>  | GO:0007010 | cytoskeleton organization                                     | 111       | 21          | 18.05    | 0.00411  |
| <i>T. deformans</i>  | GO:0007155 | cell adhesion                                                 | 22        | 8           | 3.58     | 0.00426  |
| <i>T. flavorubra</i> | GO:0006355 | regulation of transcription, DNA-dependent                    | 593       | 186         | 123.36   | 7.60E-09 |
| <i>T. flavorubra</i> | GO:0006357 | regulation of transcription from RNA polymerase II promoter   | 238       | 74          | 49.51    | 5.60E-06 |
| <i>T. flavorubra</i> | GO:0009164 | nucleoside catabolic process                                  | 99        | 17          | 20.6     | 0.00048  |
| <i>T. flavorubra</i> | GO:0007599 | hemostasis                                                    | 4         | 4           | 0.83     | 0.00187  |
| <i>T. flavorubra</i> | GO:0080111 | DNA demethylation                                             | 4         | 4           | 0.83     | 0.00187  |
| <i>T. flavorubra</i> | GO:0000270 | peptidoglycan metabolic process                               | 4         | 4           | 0.83     | 0.00187  |
| <i>T. flavorubra</i> | GO:0050817 | coagulation                                                   | 4         | 4           | 0.83     | 0.00187  |
| <i>T. flavorubra</i> | GO:0042060 | wound healing                                                 | 4         | 4           | 0.83     | 0.00187  |
| <i>T. flavorubra</i> | GO:0006486 | protein glycosylation                                         | 63        | 21          | 13.11    | 0.00193  |
| <i>T. flavorubra</i> | GO:0009190 | cyclic nucleotide biosynthetic process                        | 7         | 5           | 1.46     | 0.00557  |
| <i>T. flavorubra</i> | GO:0006334 | nucleosome assembly                                           | 45        | 17          | 9.36     | 0.00746  |
| <i>T. flavorubra</i> | GO:0042742 | defense response to bacterium                                 | 10        | 6           | 2.08     | 0.00775  |
| <i>T. flavorubra</i> | GO:0009401 | phosphoenolpyruvate-dependent sugar phosphotransferase system | 5         | 4           | 1.04     | 0.00778  |
| <i>T. flavorubra</i> | GO:0001822 | kidney development                                            | 5         | 4           | 1.04     | 0.00778  |
| <i>T. flavorubra</i> | GO:0035295 | tube development                                              | 7         | 6           | 1.46     | 0.00893  |
| <i>T. flavorubra</i> | GO:0048481 | ovule development                                             | 3         | 3           | 0.62     | 0.00898  |
| <i>T. flavorubra</i> | GO:0030244 | cellulose biosynthetic process                                | 3         | 3           | 0.62     | 0.00898  |
| <i>T. flavorubra</i> | GO:0060003 | copper ion export                                             | 3         | 3           | 0.62     | 0.00898  |
| <i>T. flavorubra</i> | GO:0042181 | ketone biosynthetic process                                   | 3         | 3           | 0.62     | 0.00898  |
| <i>T. flavorubra</i> | GO:0042542 | response to hydrogen peroxide                                 | 8         | 4           | 1.66     | 0.00899  |
| <i>T. populina</i>   | GO:0034644 | cellular response to UV                                       | 11        | 4           | 0.71     | 0.0039   |

**Table S5.** Sex related genes in *Taphrina* species

| Gene name | Gene description                                         | <i>T. wiesneri</i> | <i>T. deformans</i>            | <i>T. flavorubra</i>             | <i>T. poplina</i> |
|-----------|----------------------------------------------------------|--------------------|--------------------------------|----------------------------------|-------------------|
| ago1      | Protein argonaute                                        | Tw_0427400.1       | Td_0235200.1                   | Tf_0142500.1                     | Tp_0501700.1      |
| byr1      | MAPK kinase                                              | Tw_0131200.1       | Td_0354000.1                   | Tf_0338900.1                     | Tp_0131000.1      |
| byr2-like | MAPK kinase kinase                                       | Tw_0001800.1       | Td_0501100.1                   | Tf_0322900.1                     | Tp_0170600.1      |
| clr4      | Histone-lysine N-methyltransferase, H3 lysine-9 specific | Tw_0541300.1       | Td_0044000.1                   | Tf_0073900.1                     | Tp_0453400.1      |
| dcr1-like | Protein Dicer                                            | Tw_0256600.1       | Td.scaffold0022<br>(4387-5675) | Tf_0249600.1                     | Tp_0058700.1      |
| mam1      | Mating factor M secretion protein mam1                   | Tw_0336500.1       | Td_0378200.1                   | Tf_0571600.1                     | Tp_0018100.1      |
| matmc_1   | Mating-type M-specific polypeptide Mc                    | Tw_0472400.1       | Td_0585100.1                   | Tf.scaffold0055<br>(34384-36194) | Tp_0379800.1      |
| matPi     | Mating-type P-specific polypeptide Pi                    | Tw_0274000.1       | Td_0029700.1                   | Tf_0012300.1                     | Tp_0255900.1      |
| mei2-like | Meiosis protein mei2                                     | Tw_0218600.1       | Td_0414900.1                   | Tf.scaffold0093<br>(22798-23411) | ND                |
| msh3-like | Mating-type switching protein swi4                       | Tw_0035800.1       | Td_0372400.1                   | Tf_0063800.1                     | Tp_0073700.1      |
| spk1      | Mitogen-activated protein kinase spk1                    | Tw_0113900.1       | Td_0016300.1                   | Tf_0216300.1                     | Tp_0348400.1      |
| rad22     | DNA repair protein RAD52 (RAD52 family)                  | Tw_0597700.1       | Td_0115900.1                   | Tf_0460600.1                     | Tp_0117500.1      |
| rhp51     | DNA repair protein rhp51 (RAD51 homolog)                 | Tw_0518700.1       | Td_0279500.1                   | Tf_0242600.1                     | Tp_0065400.1      |
| raf1      | Rik1-associated factor 1                                 | Tw_0487000.1       | Td_0271600.1                   | Tf_0111100.1                     | ND                |
| ras1      | Ras-like protein 1                                       | Tw_0357100.1       | Td_0310000.1                   | Tf_0378400.1                     | Tp_0162600.1      |
| rhp6      | Ubiquitin-conjugating enzyme E2 2                        | Tw_0398700.1       | Td_0158800.1                   | Tf_0163800.1                     | Tp_0186900.1      |
| slm9      | Histone transcription regulator slm9                     | Tw_0293500.1       | Td_0539200.1                   | Tf_0441200.1                     | Tp_0273300.1      |
| sir2      | NAD-dependent histone deacetylase sir2                   | Tw_0518900.1       | Td_0279300.1                   | Tf_0242800.1                     | Tp_0065200.1      |
| map3      | Pheromone M-factor receptor                              | ND                 | ND                             | ND                               | ND                |
| ste11     | Transcription factor ste11                               | Tw_0328200.1       | Td_0356600.1                   | Tf_0098200.1                     | Tp_0204900.1      |
| shk1      | Serine/threonine-protein kinase shk1/pak1                | Tw_0179900.1       | Td_0407600.1                   | Tf_0231600.1                     | Tp_0098300.1      |
| swi1      | Mating-type switching protein swi1                       | Tw_0016200.1       | Td_0229000.1                   | Tf_0487500.1                     | Tp_0149300.1      |
| sap1      | switch-activating protein Sap1                           | ND                 | ND                             | ND                               | ND                |
| swi2      | Swi5 complex subunit Swi2                                | ND                 | ND                             | ND                               | ND                |
| swi5      | Mating-type switching protein swi5                       | Tw_0010600.1       | Td_0224100.1                   | Tf_0332500.1                     | Tp_0180000.1      |
| swi6      | Chromatin-associated protein swi6                        | ND                 | ND                             | ND                               | ND                |
| swi10     | Mating-type switching protein swi10                      | Tw_0026000.1       | Td_0611500.1                   | Tf_0274300.1                     | Tp_0239500.1      |
| msh3      | MutS protein homolog 3                                   | Tw_0035800.1       | Td_0372400.1                   | Tf_0063800.1                     | Tp_0073700.1      |
| clr1      | cryptic loci regulator Clr1                              | ND                 | ND                             | ND                               | ND                |

ND; not detected

**Table S6.** Comparisons of the numbers of CAZymes in *Taphrina* species and other fungi

|       | Tw  | Td  | Tf  | Tp  | Sp  | Pj | Sc  | Fg  | Nc  | Ss  | Um  |
|-------|-----|-----|-----|-----|-----|----|-----|-----|-----|-----|-----|
| CBM   | 15  | 14  | 14  | 14  | 6   | 4  | 10  | 69  | 45  | 66  | 10  |
| CE    | 43  | 48  | 45  | 48  | 17  | 7  | 18  | 140 | 65  | 99  | 62  |
| GH    | 88  | 87  | 85  | 84  | 56  | 11 | 58  | 253 | 182 | 223 | 108 |
| GT    | 90  | 81  | 82  | 80  | 61  | 34 | 68  | 109 | 83  | 92  | 67  |
| PL    | 1   | 1   | 1   | 0   | 0   | 0  | 0   | 17  | 4   | 5   | 3   |
| Total | 237 | 231 | 227 | 226 | 140 | 56 | 154 | 588 | 379 | 485 | 250 |

Td: *T. deformans*, Tw: *T. wiesneri*, Tf: *T. flavorubra*, Tp: *T. populina*,

Sp: *S. pombe*, Pj: *Pneumocystis jirovecii*, Sc: *S. cerevisiae*, Fg: *Fusarium graminearum*, Nc: *Neurospora crassa*, Ss: *Sclerotinia sclerotiorum*, Um: *Ustilago maydis*.

CBM: Carbohydrate-Binding Modules, CE: Carbohydrate Esterases, GH: Glycoside Hydrolases, GT: GlycosylTransferases, PL: Polysaccharide Lyases

**Table S7.** Gene numbers of each Cazyme family in Fungi

| Cazyme family | Tw | Td | Tf | Tp | Sp | Pj | Sc | Fg | Nc | Ss | Um | Known Substrate                 |
|---------------|----|----|----|----|----|----|----|----|----|----|----|---------------------------------|
| CBM1          | 0  | 0  | 0  | 0  | 1  | 0  | 0  | 11 | 17 | 19 | 0  |                                 |
| CBM13         | 0  | 0  | 0  | 0  | 0  | 0  | 0  | 4  | 3  | 3  | 2  |                                 |
| CBM16         | 0  | 0  | 0  | 0  | 0  | 0  | 0  | 4  | 0  | 0  | 0  |                                 |
| CBM17         | 0  | 0  | 0  | 0  | 0  | 0  | 0  | 0  | 0  | 1  | 0  |                                 |
| CBM18         | 0  | 0  | 0  | 0  | 0  | 0  | 1  | 11 | 4  | 12 | 1  |                                 |
| CBM19         | 1  | 1  | 1  | 1  | 0  | 0  | 1  | 0  | 0  | 0  | 0  |                                 |
| CBM20         | 1  | 1  | 1  | 1  | 0  | 0  | 0  | 1  | 3  | 5  | 0  |                                 |
| CBM21         | 1  | 1  | 1  | 1  | 0  | 0  | 4  | 2  | 1  | 1  | 0  |                                 |
| CBM22         | 0  | 0  | 0  | 0  | 0  | 0  | 0  | 3  | 0  | 0  | 0  |                                 |
| CBM23         | 0  | 0  | 0  | 0  | 1  | 0  | 0  | 0  | 0  | 0  | 0  |                                 |
| CBM24         | 0  | 0  | 0  | 0  | 0  | 0  | 0  | 2  | 4  | 6  | 0  |                                 |
| CBM27         | 0  | 1  | 1  | 1  | 1  | 0  | 0  | 0  | 0  | 0  | 0  |                                 |
| CBM32         | 1  | 1  | 0  | 1  | 0  | 0  | 1  | 2  | 1  | 0  | 0  |                                 |
| CBM35         | 0  | 0  | 0  | 0  | 0  | 0  | 0  | 2  | 1  | 1  | 1  |                                 |
| CBM37         | 1  | 0  | 0  | 0  | 0  | 0  | 0  | 0  | 0  | 1  | 0  |                                 |
| CBM38         | 0  | 0  | 0  | 0  | 0  | 0  | 0  | 0  | 1  | 0  | 0  |                                 |
| CBM39         | 0  | 0  | 0  | 0  | 0  | 1  | 0  | 0  | 0  | 0  | 0  |                                 |
| CBM4          | 0  | 0  | 0  | 0  | 0  | 0  | 0  | 0  | 0  | 0  | 1  |                                 |
| CBM42         | 0  | 0  | 0  | 0  | 0  | 0  | 0  | 1  | 1  | 1  | 0  |                                 |
| CBM43         | 1  | 1  | 1  | 1  | 2  | 1  | 2  | 1  | 1  | 1  | 1  |                                 |
| CBM46         | 0  | 0  | 0  | 0  | 0  | 0  | 0  | 0  | 0  | 1  | 0  |                                 |
| CBM48         | 1  | 1  | 1  | 1  | 0  | 1  | 1  | 1  | 1  | 2  | 1  |                                 |
| CBM50         | 4  | 3  | 4  | 3  | 0  | 0  | 0  | 9  | 5  | 6  | 2  |                                 |
| CBM51         | 0  | 0  | 0  | 0  | 0  | 0  | 0  | 0  | 0  | 1  | 0  |                                 |
| CBM52         | 4  | 4  | 4  | 3  | 1  | 1  | 0  | 0  | 1  | 0  | 0  |                                 |
| CBM53         | 0  | 0  | 0  | 1  | 0  | 0  | 0  | 0  | 0  | 0  | 0  |                                 |
| CBM6          | 0  | 0  | 0  | 0  | 0  | 0  | 0  | 1  | 0  | 1  | 0  |                                 |
| CBM61         | 0  | 0  | 0  | 0  | 0  | 0  | 0  | 5  | 0  | 2  | 0  |                                 |
| CBM63         | 0  | 0  | 0  | 0  | 0  | 0  | 0  | 3  | 0  | 1  | 1  |                                 |
| CBM66         | 0  | 0  | 0  | 0  | 0  | 0  | 0  | 1  | 0  | 0  | 0  |                                 |
| CBM67         | 0  | 0  | 0  | 0  | 0  | 0  | 0  | 4  | 1  | 1  | 0  |                                 |
| CBM9          | 0  | 0  | 0  | 0  | 0  | 0  | 0  | 1  | 0  | 0  | 0  |                                 |
| CE1           | 11 | 15 | 13 | 11 | 6  | 3  | 10 | 29 | 18 | 17 | 14 |                                 |
| CE10          | 21 | 20 | 21 | 25 | 8  | 3  | 3  | 66 | 26 | 42 | 31 |                                 |
| CE11          | 0  | 0  | 0  | 0  | 0  | 0  | 1  | 0  | 0  | 0  | 0  |                                 |
| CE12          | 2  | 3  | 2  | 2  | 0  | 0  | 1  | 5  | 2  | 5  | 0  |                                 |
| CE13          | 0  | 0  | 0  | 0  | 0  | 0  | 0  | 0  | 0  | 0  | 2  |                                 |
| CE14          | 1  | 0  | 1  | 2  | 1  | 0  | 1  | 0  | 1  | 1  | 1  |                                 |
| CE15          | 0  | 0  | 0  | 0  | 0  | 0  | 0  | 0  | 1  | 2  | 0  |                                 |
| CE16          | 2  | 2  | 2  | 1  | 0  | 0  | 0  | 5  | 2  | 6  | 0  |                                 |
| CE2           | 0  | 1  | 0  | 0  | 0  | 0  | 0  | 1  | 1  | 1  | 0  |                                 |
| CE3           | 2  | 1  | 1  | 1  | 1  | 0  | 0  | 7  | 5  | 4  | 0  |                                 |
| CE4           | 1  | 1  | 1  | 1  | 1  | 0  | 2  | 9  | 4  | 5  | 8  |                                 |
| CE5           | 2  | 3  | 3  | 4  | 0  | 0  | 0  | 13 | 3  | 8  | 4  |                                 |
| CE6           | 0  | 0  | 0  | 0  | 0  | 0  | 0  | 0  | 0  | 0  | 0  |                                 |
| CE7           | 0  | 1  | 0  | 0  | 0  | 1  | 0  | 1  | 0  | 1  | 0  |                                 |
| CE8           | 1  | 1  | 1  | 1  | 0  | 0  | 0  | 3  | 1  | 5  | 1  | PCW (Pectin)                    |
| CE9           | 0  | 0  | 0  | 0  | 0  | 0  | 0  | 1  | 1  | 2  | 1  |                                 |
| GH1           | 0  | 0  | 0  | 1  | 0  | 0  | 0  | 3  | 1  | 3  | 0  | CW (b-glucans)                  |
| GH10          | 1  | 1  | 0  | 0  | 0  | 0  | 0  | 5  | 4  | 2  | 2  | PCW (hemicellulose)             |
| GH105         | 1  | 1  | 1  | 1  | 0  | 0  | 0  | 3  | 2  | 1  | 2  | PCW (Pectin)                    |
| GH106         | 1  | 1  | 1  | 1  | 0  | 0  | 0  | 1  | 0  | 1  | 0  |                                 |
| GH108         | 0  | 0  | 0  | 0  | 0  | 0  | 0  | 0  | 1  | 0  | 0  |                                 |
| GH109         | 3  | 3  | 3  | 3  | 3  | 0  | 1  | 15 | 4  | 6  | 6  |                                 |
| GH11          | 0  | 0  | 0  | 0  | 0  | 0  | 0  | 2  | 2  | 3  | 1  | PCW (hemicellulose)             |
| GH114         | 1  | 1  | 1  | 2  | 0  | 0  | 0  | 2  | 1  | 1  | 0  |                                 |
| GH115         | 0  | 0  | 0  | 0  | 0  | 0  | 0  | 2  | 1  | 1  | 1  | PCW (hemicellulose)             |
| GH12          | 1  | 1  | 1  | 1  | 0  | 0  | 0  | 4  | 1  | 4  | 0  | PCW (cellulose)                 |
| GH121         | 0  | 0  | 0  | 0  | 0  | 0  | 0  | 1  | 1  | 0  | 0  |                                 |
| GH125         | 2  | 2  | 2  | 2  | 1  | 0  | 0  | 3  | 3  | 3  | 1  | PG (N-glycans)                  |
| GH127         | 0  | 0  | 0  | 0  | 0  | 0  | 0  | 2  | 0  | 0  | 0  |                                 |
| GH128         | 6  | 5  | 5  | 5  | 1  | 0  | 0  | 4  | 3  | 3  | 5  |                                 |
| GH13          | 7  | 8  | 8  | 8  | 12 | 1  | 8  | 4  | 9  | 9  | 3  | FCW + ESR (a-glucans)           |
| GH131         | 0  | 0  | 0  | 0  | 0  | 0  | 0  | 1  | 3  | 2  | 0  |                                 |
| GH132         | 2  | 2  | 2  | 2  | 3  | 1  | 5  | 2  | 2  | 0  | 0  |                                 |
| GH15          | 1  | 1  | 1  | 1  | 2  | 0  | 1  | 2  | 2  | 4  | 1  | ESR (a-glycans)                 |
| GH16          | 16 | 14 | 14 | 13 | 3  | 0  | 4  | 24 | 15 | 18 | 20 | FCW (b-glycans)                 |
| GH17          | 2  | 2  | 3  | 3  | 1  | 0  | 4  | 3  | 4  | 6  | 2  | FCW (b-1,3-glucan)              |
| GH18          | 3  | 3  | 3  | 3  | 1  | 0  | 2  | 18 | 12 | 14 | 4  | FCW (chitin)                    |
| GH2           | 0  | 0  | 0  | 0  | 0  | 0  | 0  | 10 | 5  | 2  | 1  | CW (b-glucans)                  |
| GH20          | 1  | 1  | 1  | 1  | 0  | 0  | 0  | 3  | 1  | 1  | 2  | FCW (chitin)                    |
| GH23          | 0  | 0  | 0  | 0  | 0  | 0  | 0  | 1  | 0  | 2  | 2  | BPG                             |
| GH25          | 0  | 0  | 0  | 0  | 0  | 0  | 0  | 0  | 1  | 1  | 1  | BPG                             |
| GH26          | 0  | 0  | 0  | 0  | 0  | 0  | 0  | 0  | 1  | 1  | 1  | BPG                             |
| GH27          | 0  | 0  | 0  | 0  | 1  | 0  | 0  | 2  | 0  | 3  | 1  | PCW (hemicellulose)             |
| GH28          | 3  | 3  | 3  | 1  | 0  | 0  | 1  | 6  | 2  | 16 | 1  | PCW (Pectin)                    |
| GH29          | 0  | 0  | 0  | 0  | 0  | 0  | 0  | 1  | 0  | 0  | 0  | PCW (hemicellulose)             |
| GH3           | 3  | 3  | 2  | 2  | 1  | 0  | 0  | 21 | 10 | 13 | 3  | CW (b-glucans)                  |
| GH30          | 1  | 1  | 1  | 0  | 0  | 0  | 0  | 0  | 2  | 0  | 2  | FCW                             |
| GH31          | 2  | 3  | 3  | 2  | 4  | 1  | 1  | 8  | 5  | 6  | 3  | PG + ESR + PCW (hemicellulose)  |
| GH32          | 1  | 1  | 1  | 0  | 2  | 1  | 1  | 6  | 1  | 1  | 2  | ESR (sucrose/inulin)            |
| GH33          | 0  | 0  | 0  | 0  | 0  | 1  | 2  | 1  | 0  | 1  | 0  |                                 |
| GH35          | 0  | 0  | 0  | 0  | 0  | 0  | 0  | 3  | 2  | 4  | 1  | PCW (hemicellulose)             |
| GH36          | 0  | 0  | 0  | 0  | 0  | 0  | 0  | 2  | 0  | 0  | 0  | PCW (hemicellulose)             |
| GH37          | 2  | 2  | 2  | 2  | 1  | 1  | 2  | 2  | 2  | 1  | 2  | ESR (trehalose)                 |
| GH38          | 0  | 0  | 0  | 1  | 1  | 0  | 1  | 1  | 1  | 1  | 2  | PG (N-/O-glycans)               |
| GH4           | 0  | 0  | 0  | 0  | 0  | 0  | 0  | 1  | 1  | 0  | 0  | ESR                             |
| GH42          | 0  | 0  | 0  | 0  | 0  | 0  | 0  | 0  | 0  | 0  | 1  |                                 |
| GH43          | 0  | 0  | 0  | 0  | 0  | 0  | 0  | 19 | 7  | 5  | 2  | PCW (pectin + hemicellulose)    |
| GH44          | 0  | 0  | 0  | 0  | 0  | 0  | 0  | 0  | 0  | 0  | 0  |                                 |
| GH45          | 0  | 0  | 0  | 0  | 0  | 0  | 0  | 1  | 1  | 2  | 3  | PCW (cellulose)                 |
| GH47          | 4  | 4  | 4  | 4  | 2  | 1  | 3  | 6  | 8  | 8  | 3  | PG (N-/O-glycans)               |
| GH5           | 8  | 9  | 7  | 7  | 3  | 0  | 4  | 14 | 6  | 14 | 12 | PCW (cellulose + hemicellulose) |
| GH51          | 0  | 0  | 0  | 0  | 0  | 0  | 0  | 2  | 1  | 2  | 2  | PCW (hemicellulose)             |

|      |    |    |    |    |   |   |   |    |    |    |    |                     |
|------|----|----|----|----|---|---|---|----|----|----|----|---------------------|
| GH53 | 0  | 0  | 0  | 1  | 0 | 0 | 0 | 1  | 1  | 2  | 0  | PCW (hemicellulose) |
| GH54 | 0  | 0  | 0  | 0  | 0 | 0 | 0 | 1  | 1  | 1  | 0  | PCW (hemicellulose) |
| GH55 | 1  | 1  | 1  | 1  | 0 | 0 | 0 | 3  | 6  | 4  | 1  | FCW (b-1,3-glucan)  |
| GH6  | 0  | 0  | 0  | 0  | 0 | 0 | 0 | 1  | 3  | 1  | 0  | PCW (cellulose)     |
| GH62 | 0  | 0  | 0  | 0  | 0 | 0 | 0 | 1  | 0  | 0  | 1  | PCW (hemicellulose) |
| GH63 | 2  | 2  | 2  | 2  | 1 | 1 | 2 | 1  | 1  | 1  | 1  | PG (N-glycans)      |
| GH64 | 0  | 0  | 0  | 0  | 0 | 0 | 0 | 2  | 2  | 2  | 0  | CW (β-1,3-glucan)   |
| GH65 | 0  | 0  | 0  | 0  | 0 | 0 | 1 | 0  | 0  | 1  | 0  | ESR (trehalose)     |
| GH67 | 0  | 0  | 0  | 0  | 0 | 0 | 0 | 1  | 1  | 0  | 0  | PCW (hemicellulose) |
| GH7  | 0  | 0  | 0  | 0  | 0 | 0 | 0 | 2  | 5  | 3  | 0  | PCW (cellulose)     |
| GH71 | 2  | 2  | 2  | 2  | 2 | 0 | 0 | 0  | 5  | 8  | 0  | FCW (b-1,3-glucan)  |
| GH72 | 4  | 4  | 4  | 4  | 4 | 1 | 5 | 3  | 5  | 6  | 1  | FCW (b-1,3-glucan)  |
| GH73 | 0  | 0  | 0  | 0  | 0 | 0 | 0 | 1  | 0  | 0  | 0  |                     |
| GH74 | 1  | 1  | 1  | 1  | 1 | 0 | 6 | 2  | 2  | 1  | 1  | PCW (cellulose)     |
| GH75 | 0  | 0  | 0  | 0  | 0 | 0 | 0 | 1  | 1  | 0  | 0  | FCW (chitin)        |
| GH76 | 1  | 2  | 1  | 1  | 4 | 1 | 2 | 8  | 10 | 12 | 1  | FCW (chitin)        |
| GH78 | 1  | 0  | 2  | 0  | 0 | 0 | 0 | 7  | 1  | 4  | 0  | PCW (Pectin)        |
| GH79 | 0  | 0  | 0  | 3  | 0 | 0 | 0 | 1  | 2  | 2  | 1  |                     |
| GH8  | 0  | 0  | 0  | 0  | 0 | 0 | 0 | 0  | 0  | 0  | 1  | CW                  |
| GH81 | 2  | 2  | 2  | 2  | 2 | 1 | 2 | 1  | 1  | 1  | 0  | FCW (b-1,3-glucan)  |
| GH85 | 0  | 0  | 0  | 0  | 0 | 0 | 0 | 0  | 0  | 0  | 1  | FCW                 |
| GH88 | 0  | 0  | 0  | 0  | 0 | 0 | 0 | 1  | 0  | 0  | 0  | PCW (pectin)        |
| GH89 | 0  | 0  | 0  | 0  | 0 | 0 | 0 | 0  | 0  | 1  | 0  | FCW                 |
| GH9  | 0  | 0  | 0  | 0  | 0 | 0 | 0 | 0  | 1  | 0  | 1  | CW                  |
| GH92 | 1  | 1  | 1  | 1  | 0 | 0 | 0 | 0  | 2  | 5  | 3  |                     |
| GH93 | 0  | 0  | 0  | 0  | 0 | 0 | 0 | 2  | 3  | 1  | 0  | PCW (hemicellulose) |
| GH94 | 0  | 0  | 0  | 0  | 0 | 0 | 0 | 0  | 1  | 0  | 0  | PCW (cellulose)     |
| GH95 | 0  | 0  | 0  | 0  | 0 | 0 | 0 | 2  | 0  | 2  | 0  |                     |
| GH99 | 1  | 0  | 0  | 0  | 0 | 0 | 0 | 0  | 0  | 0  | 0  |                     |
| GT1  | 1  | 1  | 1  | 1  | 0 | 0 | 1 | 14 | 4  | 7  | 3  |                     |
| GT15 | 4  | 4  | 4  | 4  | 6 | 0 | 9 | 3  | 5  | 4  | 2  |                     |
| GT17 | 1  | 0  | 1  | 0  | 0 | 0 | 0 | 1  | 1  | 2  | 1  |                     |
| GT2  | 14 | 14 | 12 | 13 | 3 | 2 | 4 | 18 | 12 | 18 | 16 |                     |
| GT20 | 3  | 3  | 3  | 3  | 5 | 2 | 4 | 3  | 3  | 3  | 3  |                     |
| GT21 | 3  | 2  | 2  | 2  | 0 | 1 | 0 | 1  | 1  | 1  | 1  |                     |
| GT22 | 4  | 4  | 4  | 4  | 4 | 2 | 4 | 4  | 3  | 3  | 4  |                     |
| GT23 | 2  | 0  | 0  | 0  | 0 | 0 | 0 | 0  | 0  | 0  | 0  |                     |
| GT24 | 1  | 1  | 1  | 1  | 1 | 1 | 1 | 1  | 1  | 1  | 1  |                     |
| GT25 | 1  | 1  | 2  | 1  | 0 | 0 | 0 | 1  | 2  | 3  | 0  |                     |
| GT26 | 0  | 0  | 1  | 0  | 0 | 0 | 0 | 1  | 0  | 0  | 0  |                     |
| GT28 | 2  | 2  | 2  | 2  | 1 | 1 | 1 | 1  | 0  | 1  | 1  |                     |
| GT29 | 0  | 0  | 0  | 1  | 0 | 0 | 0 | 0  | 0  | 0  | 0  |                     |
| GT3  | 1  | 1  | 1  | 1  | 0 | 1 | 2 | 1  | 1  | 1  | 1  |                     |
| GT31 | 3  | 0  | 2  | 1  | 1 | 0 | 0 | 2  | 2  | 2  | 3  |                     |
| GT32 | 9  | 10 | 9  | 9  | 5 | 2 | 4 | 6  | 5  | 5  | 2  |                     |
| GT33 | 1  | 1  | 1  | 1  | 1 | 2 | 1 | 1  | 1  | 1  | 1  |                     |
| GT34 | 4  | 3  | 3  | 2  | 7 | 0 | 2 | 5  | 3  | 2  | 0  |                     |
| GT35 | 0  | 0  | 0  | 0  | 0 | 1 | 1 | 1  | 1  | 1  | 0  |                     |
| GT39 | 3  | 3  | 3  | 3  | 3 | 4 | 7 | 3  | 4  | 3  | 3  |                     |
| GT4  | 4  | 4  | 4  | 4  | 3 | 4 | 3 | 5  | 6  | 5  | 4  |                     |
| GT41 | 0  | 0  | 0  | 0  | 0 | 0 | 0 | 1  | 1  | 0  | 0  |                     |
| GT44 | 0  | 0  | 0  | 0  | 0 | 0 | 1 | 0  | 0  | 0  | 0  |                     |
| GT48 | 1  | 1  | 1  | 1  | 4 | 1 | 3 | 1  | 1  | 1  | 1  |                     |
| GT49 | 0  | 0  | 0  | 0  | 0 | 0 | 0 | 0  | 0  | 0  | 0  |                     |
| GT5  | 1  | 2  | 2  | 2  | 5 | 0 | 0 | 0  | 2  | 1  | 0  |                     |
| GT50 | 1  | 1  | 1  | 2  | 1 | 1 | 1 | 1  | 1  | 2  | 1  |                     |
| GT54 | 0  | 0  | 0  | 0  | 0 | 0 | 0 | 1  | 0  | 0  | 0  |                     |
| GT55 | 0  | 0  | 0  | 0  | 0 | 0 | 0 | 0  | 1  | 0  | 0  |                     |
| GT57 | 2  | 2  | 2  | 2  | 2 | 3 | 2 | 2  | 2  | 1  | 2  |                     |
| GT58 | 1  | 1  | 1  | 1  | 1 | 1 | 1 | 1  | 1  | 0  | 1  |                     |
| GT59 | 1  | 1  | 1  | 1  | 1 | 2 | 1 | 1  | 1  | 1  | 1  |                     |
| GT60 | 0  | 0  | 0  | 0  | 0 | 0 | 0 | 0  | 0  | 0  | 1  |                     |
| GT62 | 3  | 3  | 3  | 3  | 2 | 0 | 3 | 3  | 3  | 3  | 0  |                     |
| GT64 | 0  | 0  | 0  | 0  | 0 | 0 | 0 | 2  | 0  | 0  | 0  |                     |
| GT65 | 0  | 0  | 0  | 0  | 0 | 0 | 0 | 0  | 1  | 0  | 0  |                     |
| GT66 | 1  | 1  | 1  | 1  | 1 | 1 | 1 | 1  | 1  | 1  | 1  |                     |
| GT68 | 3  | 2  | 1  | 2  | 0 | 0 | 0 | 0  | 0  | 3  | 0  |                     |
| GT69 | 0  | 0  | 0  | 0  | 0 | 0 | 0 | 2  | 2  | 2  | 3  |                     |
| GT71 | 4  | 3  | 4  | 4  | 0 | 0 | 6 | 5  | 1  | 2  | 2  |                     |
| GT76 | 1  | 1  | 1  | 1  | 1 | 0 | 1 | 1  | 1  | 1  | 1  |                     |
| GT77 | 0  | 0  | 0  | 0  | 0 | 0 | 0 | 2  | 1  | 0  | 0  |                     |
| GT78 | 0  | 0  | 0  | 0  | 0 | 0 | 0 | 0  | 0  | 0  | 0  |                     |
| GT8  | 8  | 6  | 6  | 4  | 3 | 2 | 4 | 7  | 2  | 5  | 2  |                     |
| GT83 | 0  | 1  | 0  | 0  | 0 | 0 | 0 | 0  | 1  | 0  | 0  |                     |
| GT90 | 2  | 2  | 2  | 2  | 0 | 0 | 0 | 6  | 5  | 5  | 5  |                     |
| GT92 | 0  | 0  | 0  | 1  | 0 | 0 | 0 | 0  | 0  | 1  | 0  |                     |
| PL1  | 0  | 0  | 0  | 0  | 0 | 0 | 0 | 5  | 1  | 4  | 1  |                     |
| PL12 | 0  | 0  | 0  | 0  | 0 | 0 | 0 | 0  | 0  | 0  | 1  |                     |
| PL20 | 0  | 0  | 0  | 0  | 0 | 0 | 0 | 1  | 1  | 0  | 0  |                     |
| PL22 | 0  | 0  | 0  | 0  | 0 | 0 | 0 | 0  | 0  | 0  | 1  |                     |
| PL3  | 1  | 1  | 1  | 0  | 0 | 0 | 0 | 7  | 1  | 0  | 0  | PCW (pectin)        |
| PL4  | 0  | 0  | 0  | 0  | 0 | 0 | 0 | 3  | 1  | 0  | 0  |                     |
| PL7  | 0  | 0  | 0  | 0  | 0 | 0 | 0 | 0  | 0  | 1  | 0  |                     |
| PL9  | 0  | 0  | 0  | 0  | 0 | 0 | 0 | 1  | 0  | 0  | 0  |                     |

Td: *T. deformans*, Tw: *T. wiesneri*, Tf: *T. flavorubra*, Tp: *T. populina*,

Sp: *S. pombe*, Pj: *Pneumocystis jirovecii*, Sc: *S. cerevisiae*, Fg: *Fusarium graminearum*, Nc: *Neurospora crassa*, Ss: *Sclerotinia sclerotiorum*, Um: *Ustilago maydis*.

CW: Cell wall; ESR, energy storage and recovery; PCW: Plant cell wall; PG, protein glycosylation; FCW: Fungal cell wall



**Table S8.** Numbers of Plant Hormone Biosynthesis related genes in *Taphrina* species

| Gene name                   | <i>T. wiesneri</i>                           | <i>T. deformans</i>                          | <i>T. flavorubra</i>                         | <i>T. populina</i>           |
|-----------------------------|----------------------------------------------|----------------------------------------------|----------------------------------------------|------------------------------|
| Auxin related genes         |                                              |                                              |                                              |                              |
| <i>Tam</i>                  | Tw_0539800.1<br>Tw_0068000.1                 | Td_0045500.1<br>Td_0263800.1                 | Tf_0075800.1<br>Tf_0034800.1                 | Tp_0005600.1<br>Tp_0431100.1 |
| <i>iad</i>                  | Tw_0363900.1                                 | Td_0302900.1                                 | Tf_0371200.1                                 | Tp_0310400.1                 |
| YUC                         | Tw_0040600.1<br>Tw_0486000.1                 | Td_0494600.1<br>Td_0270800.1                 | Tf_0058600.1<br>Tf_0112000.1                 | Tp_0416900.1                 |
| Cytokinin related genes     |                                              |                                              |                                              |                              |
| tRNA-IPT                    | Tw_0394100.1                                 | Td_0154500.1                                 | Tf_0655100.1                                 | Tp_0463300.1                 |
| CYP736A                     | Tw_0071600.1                                 | Td_0413200.1                                 | Tf_0030900.1                                 | Tp_0229800.1                 |
| LOG                         | Tw_0594900.1                                 | Td_0545400.1                                 | Tf_0152400.1                                 | Tp_0197700.1                 |
| Gibberellin related genes   |                                              |                                              |                                              |                              |
| GA2ox/GA3ox/GA21ox          | Tw_0346000.1                                 | Td_0543900.1                                 | Tf_0290500.1                                 | ND                           |
| GA4 desaturase              | Tw_0023800.1                                 | Td_0577000.1                                 | Tf_0276700.1                                 | ND                           |
| Abscisic acid related genes |                                              |                                              |                                              |                              |
| BcABA1, BcABA2              | Tw_0034000.1<br>Tw_0630300.1<br>Tw_0337600.1 | Td_0370700.1<br>Td_0583200.1<br>Td_0377100.1 | Tf_0065800.1<br>Tf_0609200.1<br>Tf_0570500.1 | Tp_0019300.1                 |
| ABA4/SDR                    | Tw_0190200.1                                 | Td_0219700.1                                 | Tf_0597000.1                                 | Tp_0507500.1                 |
| NCED                        | Tw_0006100.1                                 | Td_0481100.1                                 | Tf_0327700.1                                 | Tp_0175700.1                 |
| ABAO                        | Tw_0206000.1                                 | Td_0198000.1                                 | Tf_0174800.1                                 | Tp_0021900.1                 |

ND; not detected

**Table S9** – *Taphrina* genomic and RNAseq mapping statistics

| Library type | species name         | Total reads | Mapped reads | Duplicates* | Proper pairs | Both Pairs mapped | Singletons | Average Insert size (bp) |
|--------------|----------------------|-------------|--------------|-------------|--------------|-------------------|------------|--------------------------|
| Genomic      | <i>T. wiesneri</i>   | 66,770,014  | 97.36%       | 3.60%       | 95.79%       | 96.38%            | 0.98%      | 221                      |
| Genomic      | <i>T. deformans</i>  | 39,535,106  | 98.06%       | 3.43%       | 94.11%       | 96.98%            | 1.09%      | 245                      |
| Genomic      | <i>T. populina</i>   | 81,440,614  | 74.23%       | 15.99%      | 70.69%       | 71.96%            | 2.27%      | 227                      |
| Genomic      | <i>T. flavorubra</i> | 21,172,960  | 97.75%       | 2.11%       | 93.85%       | 96.55%            | 1.20%      | 324                      |
| RNAseq       | <i>T. wiesneri</i>   | 14,380,398  | 96%          | NA          | 83.69%       | 93.75%            | 2.44%      | 170                      |
| RNAseq       | <i>T. deformans</i>  | 11,631,387  | 96%          | NA          | 50.13%       | 93.31%            | 2.99%      | 180                      |
| RNAseq       | <i>T. populina</i>   | 14,860,360  | 91%          | NA          | 78.08%       | 87.58%            | 3.56%      | 167                      |
| RNAseq       | <i>T. flavorubra</i> | 3,978,619   | 20%          | NA          | 16.28%       | 18.24%            | 1.47%      | 165                      |

PCR duplicates were only marked in genomic DNA libraries
